# Supplementary material
Source: PubMed Central journal article supplement (PMC4304453)
Supplement: ja510328m_si_001.pdf [file ja510328m_si_001.pdf]

# ***Evidence from In Situ X-Ray Absorption Spectroscopy for the Involvement of Terminal Disulfide in the Reduction of Protons by an amorphous Molybdenum Sulfide Electrocatalyst.***

Benedikt Lassalle-Kaiser,<sup>\*§€</sup> Daniel Merki,<sup>†</sup> Heron Vrubel,<sup>†</sup> Sheraz Gul,<sup>§</sup> Vittal K. Yachandra,<sup>§</sup> Xile Hu<sup>\*†</sup> and Junko Yano<sup>\*§</sup>.

<sup>§</sup> Physical Bioscience Division, Lawrence Berkeley National Laboratory, Berkeley, California 94720, USA

<sup>€</sup> Synchrotron SOLEIL, L'Orme des Merisiers, Saint-Aubin, 91191 Gif-sur-Yvette, France.

<sup>†</sup> Laboratory of Inorganic Synthesis and Catalysis, Institute of Chemical Sciences and Engineering, Ecole Polytechnique Fédérale de Lausanne (EPFL), EPFL-ISIC-LSCI, BCH 3305, Lausanne, CH 1015, Switzerland.

## **Supplementary Information**

|                                                                                                                                    |    |
|------------------------------------------------------------------------------------------------------------------------------------|----|
| <b>Figure S1.</b> Current density as a function of potential for the MoS <sub>x</sub> film during <i>in situ</i> XAS measurements. | S2 |
| <b>Figure S2.</b> Polarization curve of the MoS <sub>x</sub> film on a rotating disk carbon electrode                              | S3 |
| <b>X-ray absorption data analysis details</b>                                                                                      | S4 |
| <b>Figure S3.</b> <i>k</i> <sup>3</sup> -weighted EXAFS signal for the MoS <sub>x</sub> film and reference compounds               | S5 |
| <b>Figure S4.</b> <i>k</i> <sup>3</sup> -weighted EXAFS signal and fits for the MoS <sub>x</sub> film.                             | S6 |
| <b>Figure S5.</b> Combined sulfur K-edge and Molybdenum L-edge spectra of the MoS <sub>x</sub> film                                | S7 |

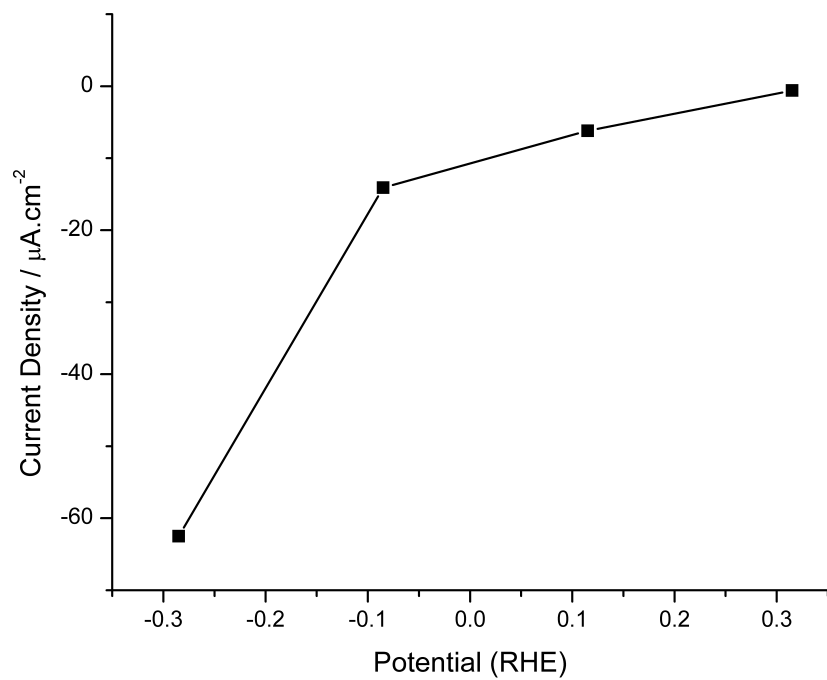

**Figure S1.** Current density as a function of potential applied on the  $\text{MoS}_x$  film during *in situ* XAS measurements. Room temperature,  $\text{pH} = 2$ , nitric acid.

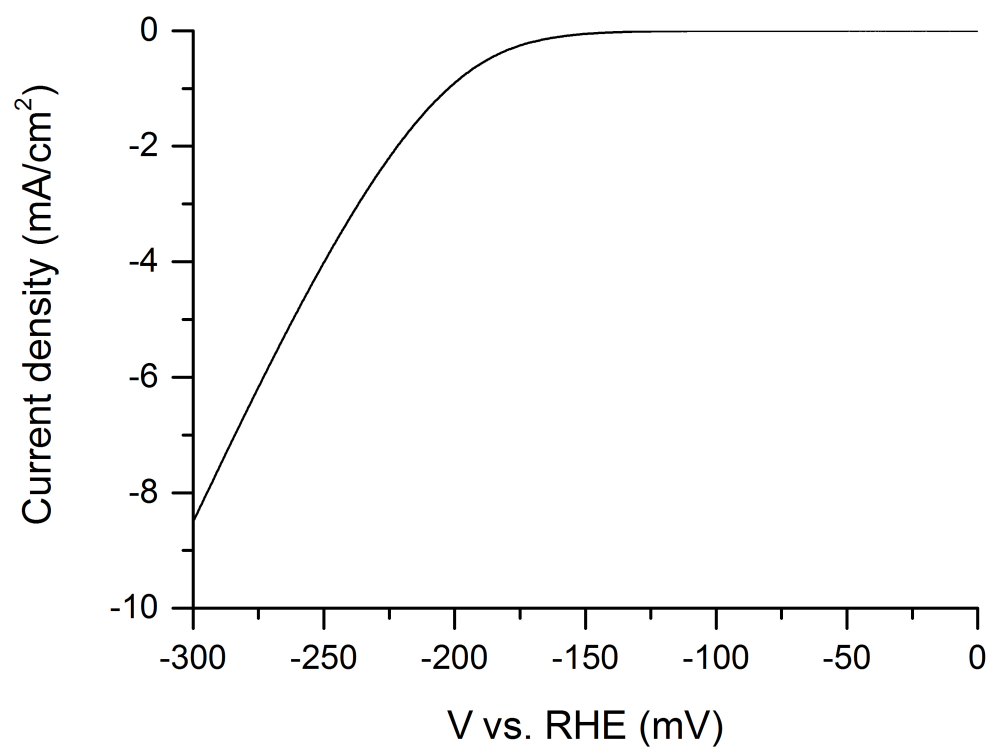

**Figure S2.** polarization curve of the MoS<sub>x</sub> film on a rotating disk carbon electrode at pH = 2; scan rate = 2 mV/s, rotating speed = 4500 rpm.

## X-ray absorption data analysis details

EXAFS curve fitting was performed with Artemis and IFEFFIT software using *ab initio*-calculated phases and amplitudes from the program FEFF 8.2. These *ab initio* phases and amplitudes were used in the EXAFS equation:

$$\chi(k) = S_0^2 \sum_j \frac{N_j}{kR_j^2} f_{eff_j}(\pi, k, R_j) e^{-2\sigma_j^2 k^2} e^{-2R_j/\lambda_j(k)} \sin(2kR_j + \phi_{ij}(k))$$

The neighboring atoms to the central atom(s) are divided into  $j$  shells, with all atoms with the same atomic number and distance from the central atom grouped into a single shell. Within each shell, the coordination number  $N_j$  denotes the number of neighboring atoms in shell  $j$  at a distance of  $R_j$  from the central atom.  $f_{eff_j}(\pi, k, R_j)$  is the *ab initio* amplitude function for shell  $j$ , and the Debye-Waller term  $e^{-2\sigma_j^2 k^2}$  accounts for damping due to static and thermal disorder in absorber-backscatterer distances. The mean free path term  $e^{-2R_j/\lambda_j(k)}$  reflects losses due to inelastic scattering, where  $\lambda_j(k)$  is the electron mean free path. The oscillations in the EXAFS spectrum are reflected in the sinusoidal term,  $\sin(2kR_j + \phi_{ij}(k))$  where  $\phi_{ij}(k)$  is the *ab initio* phase function for shell  $j$ .  $S_0^2$  is an amplitude reduction factor due to shake-up/shake-off processes at the central atom(s). The EXAFS equation was used to fit the experimental data using  $N$ ,  $R$ , and the EXAFS Debye-Waller factor ( $\sigma^2$ ) as variable parameters. For the energy (eV) to wave vector ( $k$ ,  $\text{\AA}^{-1}$ ) axis conversion,  $E_0$  was defined as 20010 eV and the  $S_0^2$  value was fixed to 0.84. All fits were performed in the R space.

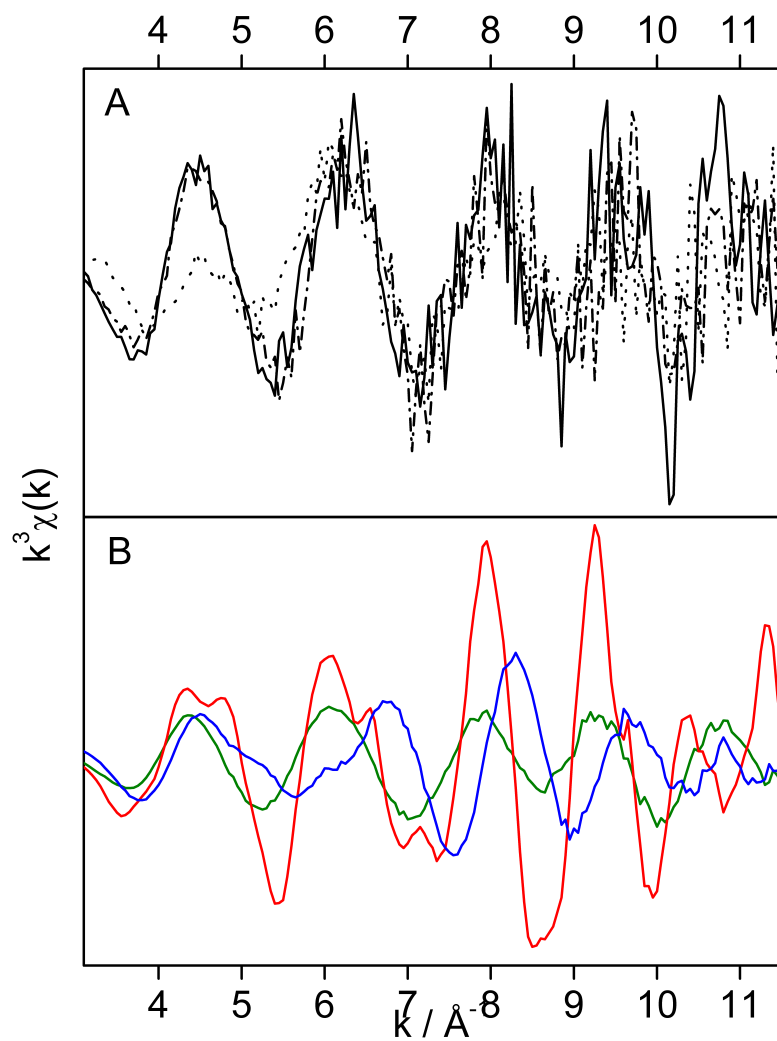

**Figure S3.** Panel A:  $k^3$ -weighted EXAFS signal for the as prepared  $\text{MoS}_x$  film (dotted black) and poised at +0.3 (plain black) and -0.3 V (dash-dot black). Panel B:  $k^3$  weighted EXAFS signal of  $\text{Mo}_3\text{S}_4$  (blue)  $\text{MoS}_3$ , (plain green) and  $\text{MoS}_2$  (red).

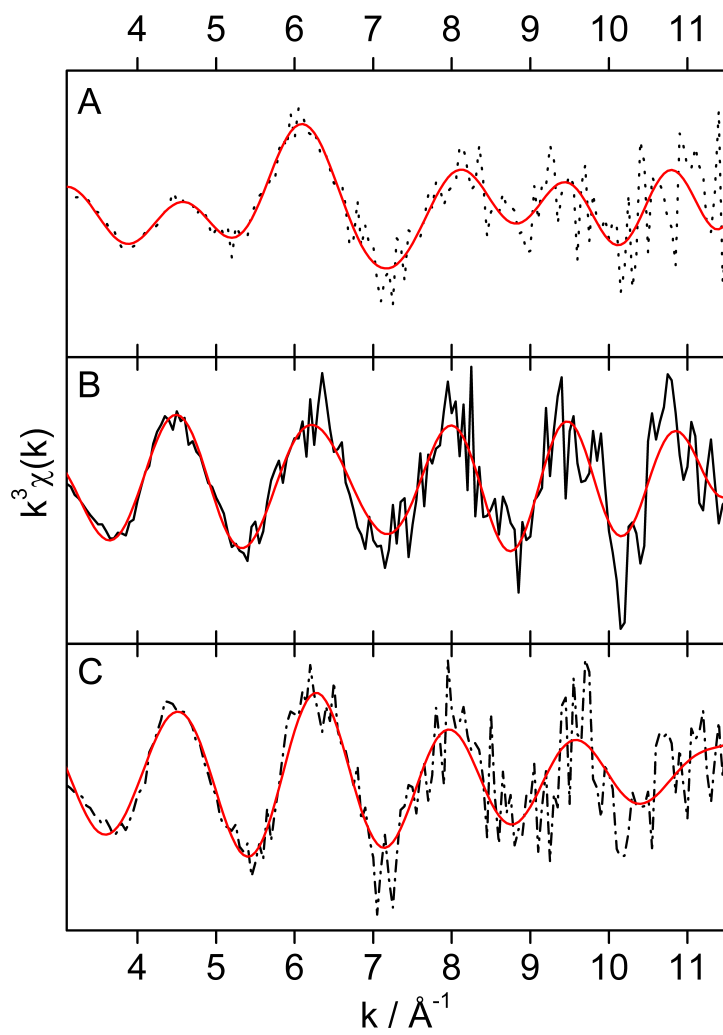

**Figure S4.**  $k^3$ -weighted EXAFS data (black) and fit (red) for the as prepared  $\text{MoS}_x$  film, (A, dotted black) poised at 0.3V (B, plain black) and at -0.3V (C, dash-dot black).

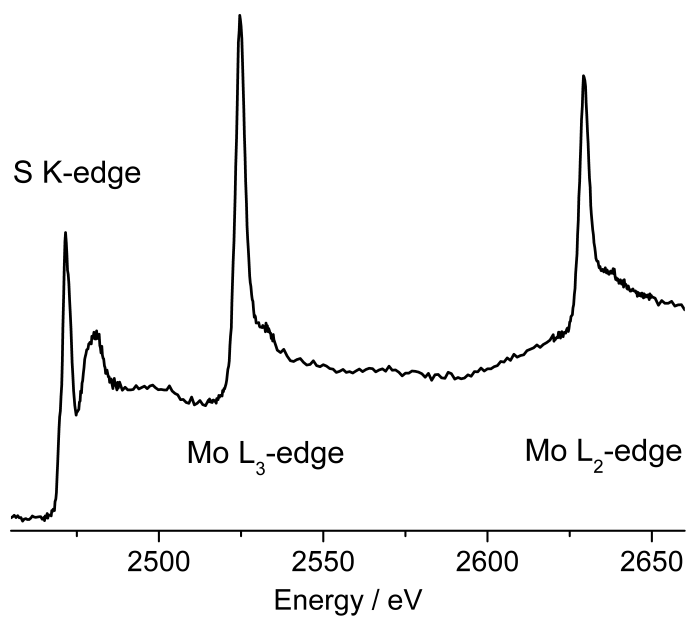

**Figure S5.** Combined sulfur K-edge and Molybdenum L<sub>3</sub>- and L<sub>2</sub>-edge spectra of the as prepared MoS<sub>x</sub> film. The spectrum is normalized to the L<sub>2</sub> edge jump. When used separately, each spectrum is normalized to its own edge jump and its own pre-edge is subtracted.
